# Supplementary material
Source: publisher figshare collection journal article supplement (https://acs.figshare.com/ndownloader/files/4020862)
Supplement: Supplementary file 1 [file 4020862]

## Supporting Information

### Use of Ionic Liquid to Significantly Improve Asymmetric Reduction of Ethyl Acetoacetate Catalyzed by *Acetobacter sp.* CCTCC M209061 Cells

*Xiao-Ting Wang<sup>a</sup>, Dong-Mei Yue<sup>a</sup>, Min-Hua Zong<sup>b</sup>, Wen-Yong Lou<sup>\*, a, b</sup>*

<sup>a</sup>Laboratory of Applied Biocatalysis, School of Light Industry and Food Sciences, South China University of Technology, Guangzhou 510640, Guangdong, China

<sup>b</sup>State Key Laboratory of Pulp and Paper Engineering, South China University of Technology, Guangzhou 510640, Guangdong, China

**Table S1.** Water-immiscible ILs used for the biocatalytic reduction of EAA and their abbreviations

| Ionic liquid                                                        | Structure                                                                            | Abbreviation                         |
|---------------------------------------------------------------------|--------------------------------------------------------------------------------------|--------------------------------------|
| 1-butyl-3-methylimidazolium<br>hexafluorophosphate                  | 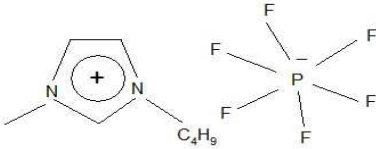   | C <sub>4</sub> mim·PF <sub>6</sub>   |
| 1-pentyl-3-methylimidazolium<br>hexafluorophosphate                 |    | C <sub>5</sub> mim·PF <sub>6</sub>   |
| 1-hexyl-3-methylimidazolium<br>hexafluorophosphate                  |    | C <sub>6</sub> mim·PF <sub>6</sub>   |
| 1-heptyl-3-methylimidazolium<br>hexafluorophosphate                 |   | C <sub>7</sub> mim·PF <sub>6</sub>   |
| 1-isobutyl-3-methylimidazolium<br>hexafluorophosphate               |  | iC <sub>4</sub> mim·PF <sub>6</sub>  |
| 1-butyl-3-methylimidazolium<br>bis(trifluoromethanesulfonyl)imide   |  | C <sub>4</sub> mim·Tf <sub>2</sub> N |
| 1-hexyl-3-methylimidazolium<br>bis(trifluoromethanesulfonyl)imide   |  | C <sub>6</sub> mim·Tf <sub>2</sub> N |
| N-butyl-N-methylpiperidinium<br>bis(trifluoromethanesulfonyl)imide  |  | PP <sub>14</sub> ·Tf <sub>2</sub> N  |
| N-butyl-N-methylpyrrolidinium<br>bis(trifluoromethanesulfonyl)imide |  | Py <sub>14</sub> ·Tf <sub>2</sub> N  |

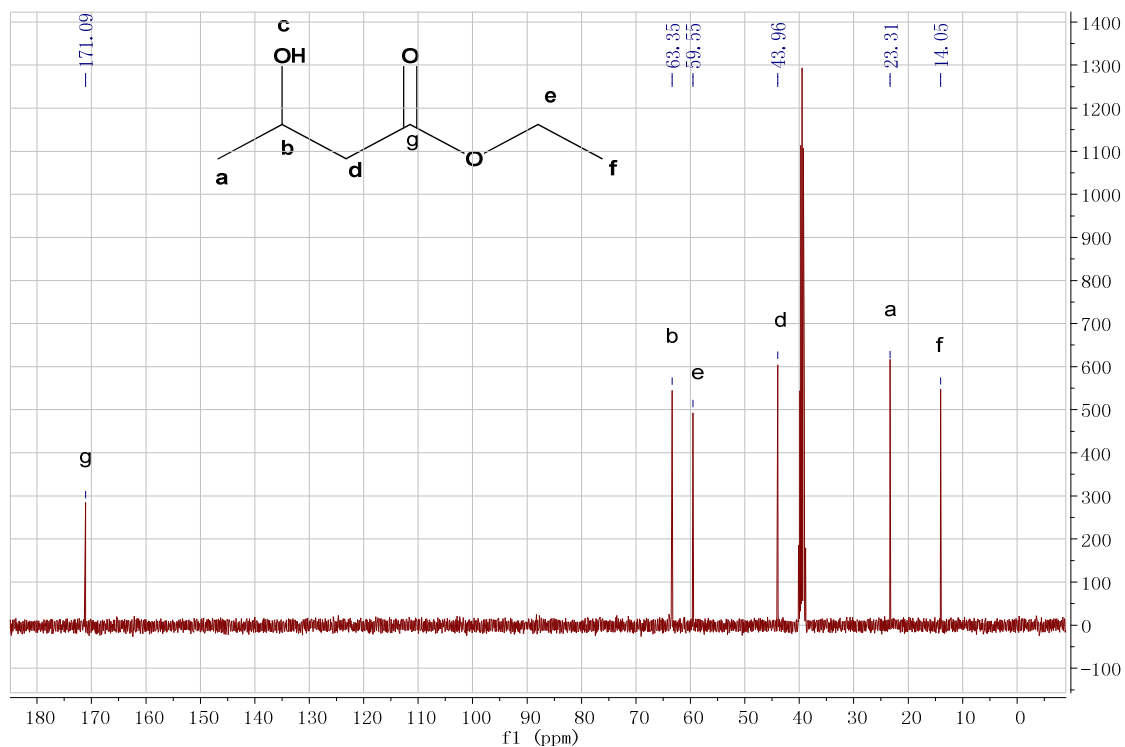

**Figure S1.**  $^{13}\text{C}$ -NMR spectrum of the isolated product EHB in the preparative scale bioreduction. The NMR spectrum of the product was obtained on a Bruker AMX300 NMR Spectrometer (Bruker Co., Germany) operating at 101 MHz for  $^{13}\text{C}$  NMR in DMSO.  $^{13}\text{C}$  NMR  $\delta$  171.09, 63.35, 59.55, 43.96, 23.31, 14.05.

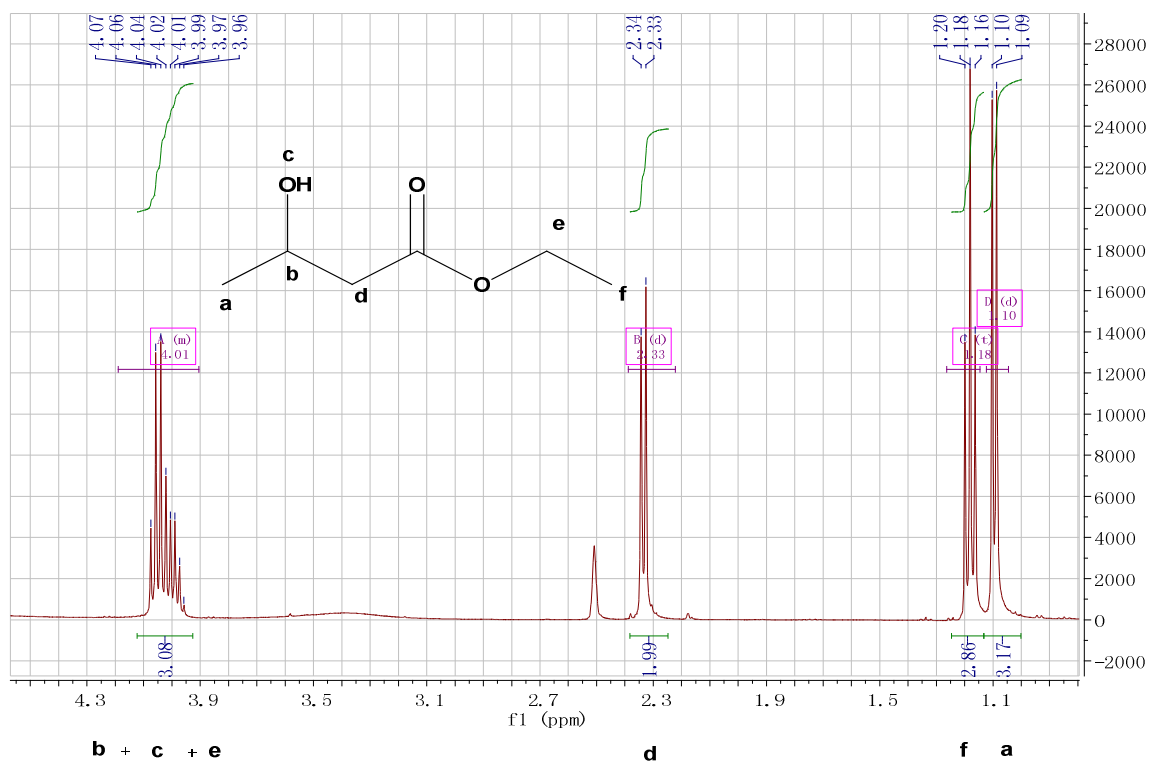

**Figure S2.** <sup>1</sup>H-NMR spectrum of the isolated product EHB in the preparative scale bioreduction. The NMR spectrum of the product was achieved on a Bruker AMX300 NMR Spectrometer (Bruker Co., Germany) operating at 400 MHz for <sup>1</sup>H NMR. <sup>1</sup>H NMR  $\delta$  4.19 – 3.90 (m, 1H), 2.33 (d,  $J$  = 6.5, 1H), 1.18 (t,  $J$  = 7.1, 1H), 1.10 (d,  $J$  = 6.2, 1H).

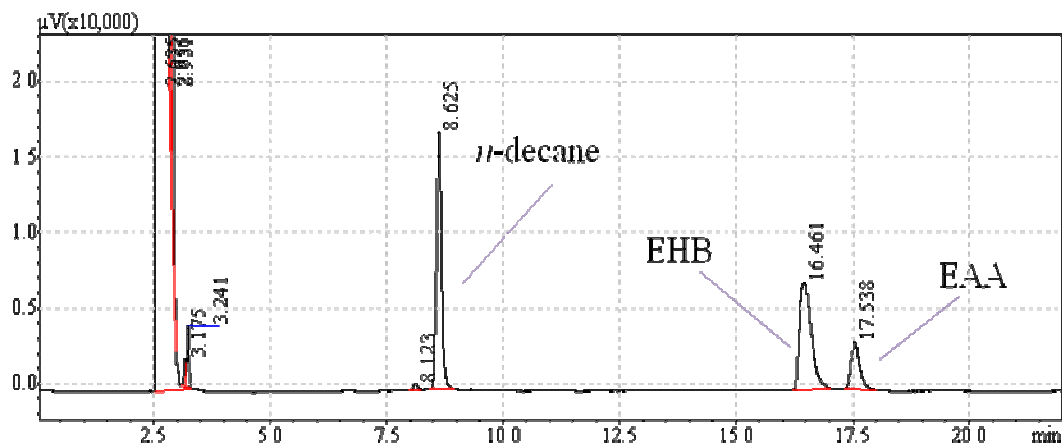

**Figure S3.** Gas chromatogram of EAA, EHB and *n*-decane (as internal standard). The reaction mixtures were analyzed by a Shimadzu GC2010 model with a flame ionization detector and a HP chiral column (10% permethylated  $\beta$ -cyclodextrin 30 m  $\times$  0.25 mm  $\times$  0.25  $\mu$ m) (USA). The split ratio was 50:1. The injector and the detector were both kept at 250 °C. The column temperature was held at 75 °C constant for 20 min. The carrier gas was nitrogen and its flow rate in the column was 2.0 mL/min.

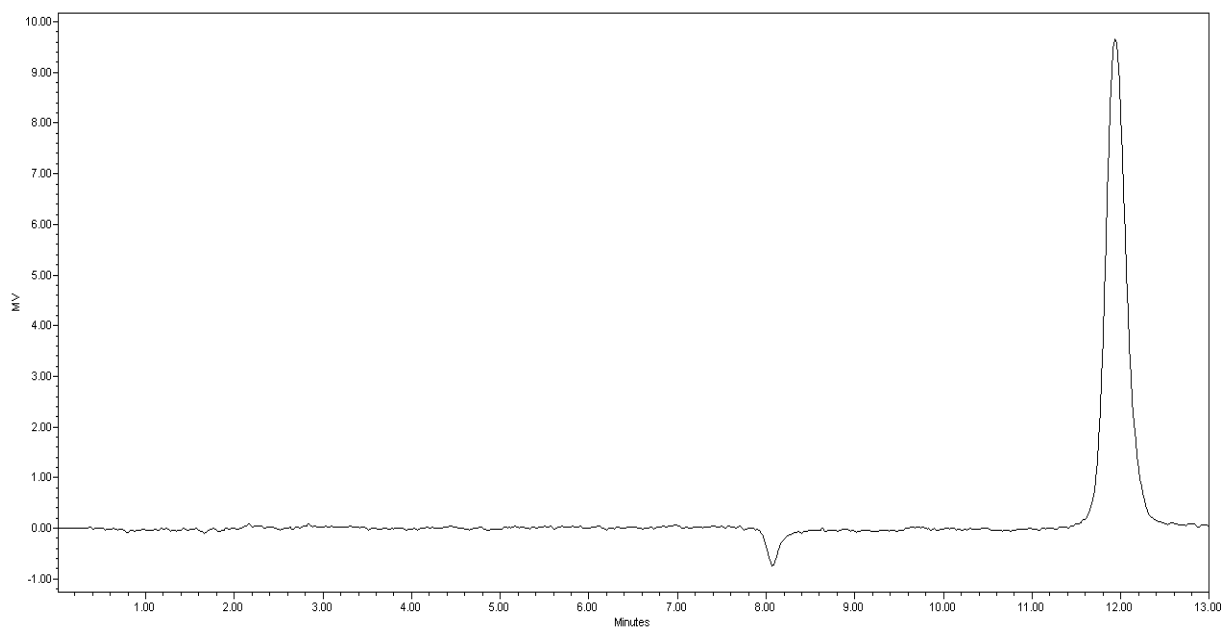

**Figure S4.** High-performance liquid chromatography (HPLC) of glucose. The glucose concentration was determined by HPLC (515 pump and 2410 differential refraction detector, Waters Cop., USA) using an Aminex HPX-87H column (7.8 mm × 300 mm) under the following conditions: mobile phase, 5.0 mmol/L H<sub>2</sub>SO<sub>4</sub>; flow rate, 0.5 mL/min; column temperature, 65 °C; detector temperature, 50 °C.
